# Supplementary material for: Short-Term Responses of Soil Microbial Communities to Changes in Air Temperature, Soil Moisture and UV Radiation
Source: MDPI journal article supplement (doi:10.3390/genes13050850), 2022-05-10
Supplement: s1 [file s1]

Supplementary information to:

# Short-Term Responses of Soil Microbial Communities to Changes in Air Temperature, Soil Moisture and UV Radiation

Isabel Silva <sup>1,2</sup>, Marta Alves <sup>3</sup>, Catarina Malheiro <sup>2</sup>, Ana Rita R. Silva<sup>2</sup>, Susana Loureiro <sup>2</sup>, Isabel Henriques <sup>1,\*</sup> and M. Nazaret González-Alcaraz <sup>4,\*</sup>

<sup>1</sup> CEF (Center for Functional Ecology), Department of Life Sciences, Faculty of Sciences and Technology, University of Coimbra, 3000-456 Coimbra, Portugal; silva.isabel@ua.pt

<sup>2</sup> CESAM (Centre for Marine and Environmental Studies), Department of Biology, University of Aveiro, 3810-193 Aveiro, Portugal; catarinalemosmalheiro@ua.pt (C.M.); ritas@ua.pt (A.R.R.S.); sloureiro@ua.pt (S.L.)

<sup>3</sup> CBQF—Center for Biotechnology and Fine Chemistry, School of Biotechnology, Portuguese Catholic University, 4169-005 Porto, Portugal; msalves@ucp.pt

<sup>4</sup> Department of Agricultural Engineering of the E.T.S.I.A. & Soil Ecology and Biotechnology Unit of the Institute of Plant Biotechnology, Technical University of Cartagena, 30203 Cartagena, Spain

\* Correspondence: isabel.henriques@uc.pt (I.H.); nazaret.gonzalez@upct.es (M.N.G.-A.)

\* Correspondence: isabel.henriques@uc.pt; nazaret.gonzalez@upct.es

Supplementary material summary: 1 cover page, 1 pages of text, 3 figures and 3 tables:

- Table S1. Summary of the scenarios simulated;
- Table S2. Predicted functional pathway changes without *E. crypticus* after exposure to each scenario tested;
- Table S3. Predicted functional pathway changes with *E. crypticus* after exposure to each scenario tested;
- Figure S1. Visual representation of the scenarios simulated: a) air temperature; b) soil moisture content c) ultraviolet (UV) radiation;
- Figure S2. Experimental set-up for (UV) radiation scenario;
- Figure S3. Bacterial absolute abundance with and without *E. crypticus* after exposure to each scenario tested;

**Table S1.** Scenarios simulated during the 48 h incubation of soil samples without and with the presence of the soil invertebrate *E. crypticus*. Standard refers to the climate conditions recommended by the standardized OECD guidelines. WHC (water holding capacity). UV (ultraviolet).

| Climate factor  | Scenario        |               |              |
|-----------------|-----------------|---------------|--------------|
|                 | Air temperature | Soil moisture | UV radiation |
| Standard        | 20°C            | 50% WHC       | Without      |
| Air temperature | 15°C–25°C       | 50% WHC       | Without      |
|                 | 20°C–30°C       | 50% WHC       | Without      |
| Soil moisture   | 20°C            | 75% WHC       | Without      |
|                 | 20°C            | 25% WHC       | Without      |
| UV radiation    | 20°C            | 50% WHC       | With         |

**Table S2.** Predicted functional pathway changes (based on top 30 KEGG functions) of Lufa 2.2 soil without the presence of the soil invertebrate *E. crypticus* after exposure to each scenario for 48 h. Only significant differences in relative abundance towards the standard conditions (↓ decrease; ↑ increase) are indicated (one-way ANOVA followed by Dunnett's post-hoc test;  $p < 0.05$ ).

| Climate scenario           | KEGG pathway                                 | KEGG ID | Tendency | P    |
|----------------------------|----------------------------------------------|---------|----------|------|
| 15°C–25°C<br>and 20°C–30°C | Metabolic pathways                           | ko01100 | ↓        | 0.05 |
|                            | Biosynthesis of secondary metabolites        | ko01110 | ↓        | 0.05 |
|                            | Microbial metabolism in diverse environments | ko01120 | ↓        | 0.00 |
|                            | Biosynthesis of antibiotics                  | ko01130 | ↓        | 0.05 |
|                            | Biosynthesis of amino acids                  | ko01230 | ↓        | 0.00 |
|                            | Aminoacyl-tRNA biosynthesis                  | ko00970 | ↓        | 0.05 |
|                            | Carbon metabolism                            | ko01200 | ↓        | 0.05 |
|                            | ABC transporters                             | ko02010 | ↓        | 0.00 |
|                            | Two-component system                         | ko02020 | ↓        | 0.00 |
|                            | Ribosome                                     | ko03010 | ↓        | 0.00 |
|                            | Purine metabolism                            | ko00230 | ↓        | 0.05 |
|                            | Quorum sensing                               | ko02024 | ↓        | 0.05 |
|                            | Oxidative phosphorylation                    | ko00190 | ↓        | 0.05 |
|                            | Pyrimidine metabolism                        | ko00240 | ↓        | 0.00 |
|                            | Pyruvate metabolism                          | ko00620 | ↓        | 0.05 |
|                            | Glyoxylate and dicarboxylate metabolism      | ko00630 | ↓        | 0.00 |
|                            | Glycolysis / Gluconeogenesis                 | ko00010 | ↓        | 0.00 |
|                            | Flagellar assembly                           | ko02040 | ↓        | 0.00 |
|                            | Amino sugar and nucleotide sugar metabolism  | ko00520 | ↓        | 0.00 |

|                |                                             |         |   |      |
|----------------|---------------------------------------------|---------|---|------|
|                | Glycine, serine and threonine metabolism    | ko00260 | ↓ | 0.00 |
|                | Cysteine and methionine metabolism          | ko00270 | ↓ | 0.00 |
|                | Propanoate metabolism                       | ko00640 | ↓ | 0.05 |
|                | Butanoate metabolism                        | ko00650 | ↓ | 0.00 |
|                | Porphyrin and chlorophyll metabolism        | ko00860 | ↓ | 0.05 |
|                | Carbon fixation pathways in prokaryotes     | ko00720 | ↓ | 0.05 |
|                | Fatty acid metabolism                       | ko01212 | ↓ | 0.00 |
|                | Alanine, aspartate and glutamate metabolism | ko00250 | ↓ | 0.00 |
|                | Starch and sucrose metabolism               | ko00500 | ↓ | 0.05 |
|                | Bacterial chemotaxis                        | ko02030 | ↓ | 0.00 |
|                | Citrate cycle (TCA cycle)                   | ko00020 | ↓ | 0.05 |
|                | Valine, leucine and isoleucine degradation  | ko00280 | ↓ | 0.00 |
|                | Pentose phosphate pathway                   | ko00030 | ↓ | 0.00 |
|                | 2-Oxocarboxylic acid metabolism             | ko01210 | ↓ | 0.00 |
| <b>Drought</b> | Biosynthesis of secondary metabolites       | ko01110 | ↑ | 0.05 |
|                | Biosynthesis of antibiotics                 | ko01130 | ↑ | 0.05 |
|                | Biosynthesis of amino acids                 | ko01230 | ↑ | 0.02 |
|                | Carbon metabolism                           | ko01200 | ↑ | 0.05 |
|                | ABC transporters                            | ko02010 | ↑ | 0.01 |
|                | Two-component system                        | ko02020 | ↓ | 0.01 |
|                | Oxidative phosphorylation                   | ko00190 | ↓ | 0.05 |
|                | Glyoxylate and dicarboxylate metabolism     | ko00630 | ↓ | 0.01 |
|                | Flagellar assembly                          | ko02040 | ↓ | 0.00 |
|                | Amino sugar and nucleotide sugar metabolism | ko00520 | ↓ | 0.00 |
|                | Glycine, serine and threonine metabolism    | ko00260 | ↓ | 0.04 |
|                | Propanoate metabolism                       | ko00640 | ↑ | 0.05 |
|                | Butanoate metabolism                        | ko00650 | ↑ | 0.01 |
|                | Porphyrin and chlorophyll metabolism        | ko00860 | ↑ | 0.05 |
|                | Carbon fixation pathways in prokaryotes     | ko00720 | ↑ | 0.05 |
|                | Fatty acid metabolism                       | ko01212 | ↑ | 0.00 |
|                | Alanine, aspartate and glutamate metabolism | ko00250 | ↑ | 0.00 |
|                | Starch and sucrose metabolism               | ko00500 | ↑ | 0.05 |
|                | Bacterial chemotaxis                        | ko02030 | ↓ | 0.02 |
|                | Citrate cycle (TCA cycle)                   | ko00020 | ↑ | 0.05 |
|                | Valine, leucine and isoleucine degradation  | ko00280 | ↑ | 0.01 |
|                | 2-Oxocarboxylic acid metabolism             | ko01210 | ↑ | 0.01 |
| <b>Flood</b>   | Quorum sensing                              | ko02024 | ↓ | 0.05 |

**Table S3.** Predicted functional pathway changes (based on top 30 KEGG functions) of Lufa 2.2 soil with the presence of the soil invertebrate *E. crypticus* after exposure to each scenario for 48 h. Only significant differences in relative abundance towards the standard conditions (↓ decrease; ↑ increase) are indicated (one-way ANOVA followed by Dunnett's post-hoc test;  $p < 0.05$ ; ANOVA). UV (ultraviolet).

| Climate scenario | KEGG pathway                             | KEGG ID | Tendency | P    |
|------------------|------------------------------------------|---------|----------|------|
| 15°C–25°C        | Propanoate metabolism                    | ko00640 | ↑        | 0.05 |
|                  | Sulfur metabolism                        | ko00920 | ↓        | 0.05 |
| 20°C–30°C        | Oxidative phosphorylation                | ko00190 | ↓        | 0.00 |
|                  | Flagellar assembly                       | ko02040 | ↓        | 0.05 |
|                  | Fatty acid metabolism                    | ko01212 | ↑        | 0.05 |
|                  | Starch and sucrose metabolism            | ko00500 | ↑        | 0.02 |
| Drought          | Flagellar assembly                       | ko02040 | ↓        | 0.05 |
|                  | Fatty acid metabolism                    | ko01212 | ↑        | 0.05 |
|                  | Methane metabolism                       | ko00680 | ↓        | 0.00 |
|                  | Pentose phosphate pathway                | ko00030 | ↓        | 0.04 |
|                  | Sulfur metabolism                        | ko00920 | ↓        | 0.05 |
| Flood            | ABC transporters                         | ko02010 | ↑        | 0.00 |
|                  | Ribosome                                 | ko03010 | ↓        | 0.05 |
|                  | Pyruvate metabolism                      | ko00620 | ↓        | 0.02 |
|                  | Glyoxylate and dicarboxylate metabolism  | ko00630 | ↓        | 0.05 |
|                  | Glycine, serine and threonine metabolism | ko00260 | ↓        | 0.03 |
|                  | Propanoate metabolism                    | ko00640 | ↓        | 0.05 |
|                  | Carbon fixation pathways in prokaryotes  | ko00720 | ↓        | 0.03 |
|                  | Flagellar assembly                       | ko02040 | ↓        | 0.05 |
|                  | Fatty acid metabolism                    | ko01212 | ↓        | 0.05 |
|                  | Pentose phosphate pathway                | ko00030 | ↑        | 0.00 |
|                  | Starch and sucrose metabolism            | ko00500 | ↑        | 0.02 |
|                  | Phosphotransferase system (PTS)          | ko02060 | ↑        | 0.00 |
|                  | 2-Oxocarboxylic acid metabolism          | ko01210 | ↑        | 0.00 |
|                  | Fructose and mannose metabolism          | ko00051 | ↑        | 0.00 |
| UV               | ABC transporters                         | ko02010 | ↓        | 0.02 |
|                  | Propanoate metabolism                    | ko00640 | ↑        | 0.05 |
|                  | Butanoate metabolism                     | ko00650 | ↑        | 0.03 |
|                  | Fatty acid metabolism                    | ko01212 | ↑        | 0.05 |
|                  | Methane metabolism                       | ko00680 | ↓        | 0.02 |

**Description of the experimental set-up for the simulation of the ultraviolet (UV) radiation scenario.**

UV radiation was supplied by two UV lamps (peak emissions at 365 nm for UVA and 312 nm for UVB; Spectroline XX15F/B, Spectronics Corporation, USA;) installed inside an acclimatized room in a permanent, static position respect to fixed platforms where the test jars were located. Both UV lamps were covered by cellulose acetate sheets previously burned under the lamps for 12 h. This allowed the stabilization of the UV radiation intensity passing through and prevented the exposure of the test jars to UVC, which is not typically found in nature due to its strong adsorption to the stratosphere ozone layer. One UV lamp was positioned at 75 cm distance from the test jars to reach the UV index of 7 and the other lamp at 65 cm distance to reach the UV index of 10. The test jars were moved between platforms to be exposed to the corresponding UV indexes (perforated parafilm covers were removed from the test jars during the periods of UV radiation emission). The UV radiation intensity reaching the test jars was checked with a spectroradiometer connected to a monochromator (Bentham Instruments, UK). The experimental set-up for the simulation of the UV radiation scenario is shown in Figure S2.

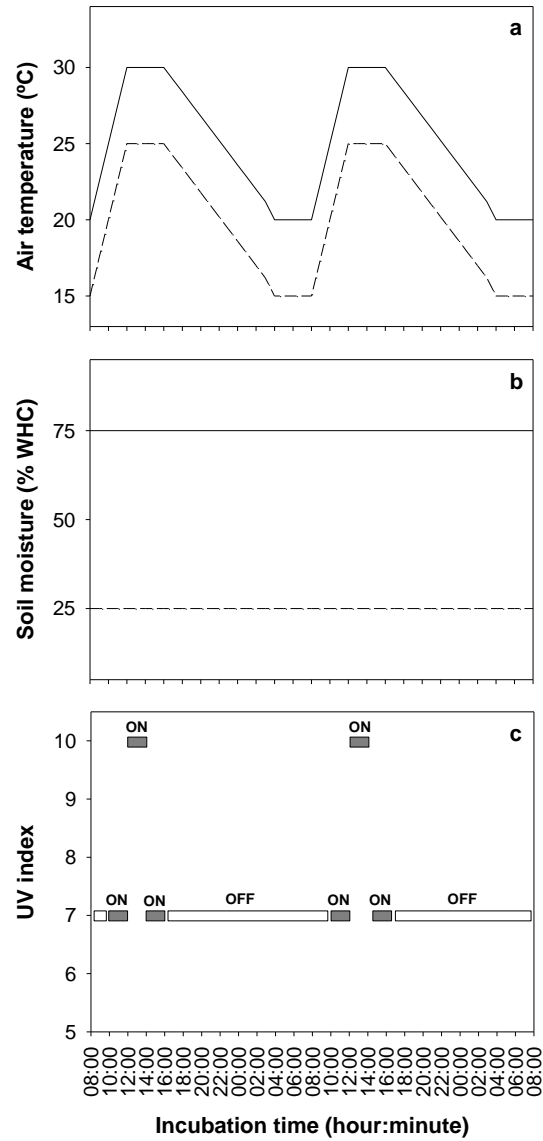

**Figure S1.** Scenarios simulated during the 48 h incubation of soil samples without and with the presence of the soil invertebrate *Enchytraeus crypticus*: a) air temperature (15°C–25°C and 20°C–30°C); b) soil moisture content (75% and 25% of soil water holding capacity, WHC); c) ultraviolet (UV) radiation (with UV radiation emission). In the UV radiation scenario “ON” indicates that the UV lamps were emitting UV radiation and “OFF” that there was no UV radiation emission.

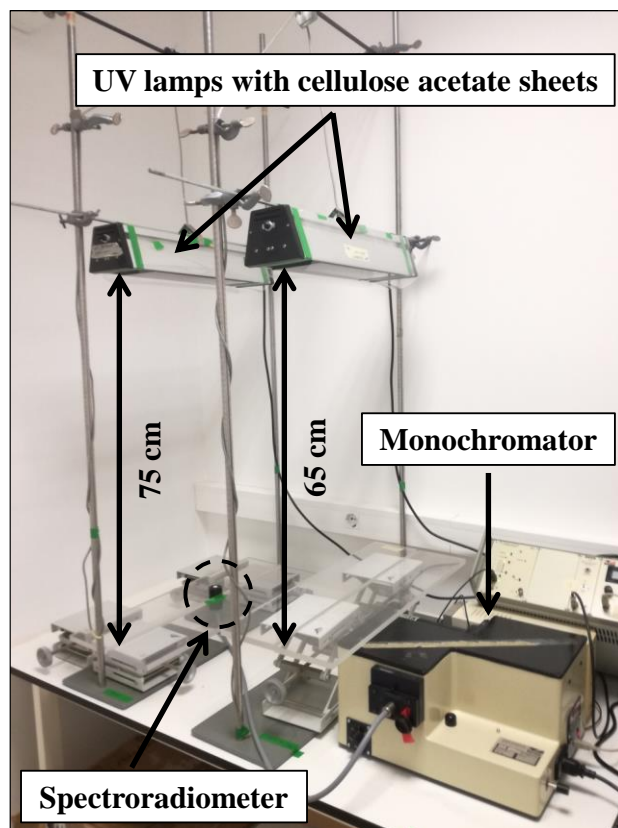

**Figure S2.** Experimental set-up for the simulation of the ultraviolet (UV) radiation scenario.

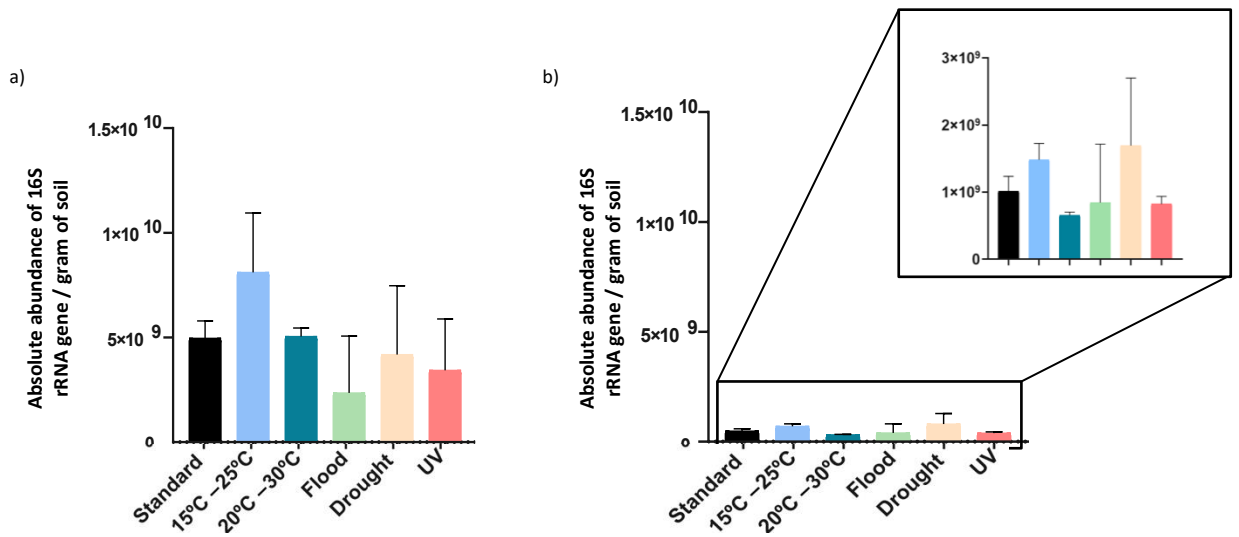

**Figure S3.** Lufa 2.2 soil without (a) and with (b) the presence of the soil invertebrate *Enchytraeus crypticus* after exposure to each scenario for 48 h. Standard refers to the climate conditions recommended by the standardized OECD guidelines. Values are average  $\pm$  SD (n=3). UV (ultraviolet).
